# Supplementary material
Source: PubMed Central journal article supplement (PMC2689955)
Supplement: pp.108.133629_2.pdf [file pp.108.133629_2.pdf]

## **Supplemental Material**

The following files are available as Supplementary Material:

ST1: Supp. Table 1 providing absolute metabolite concentrations for the K-deficiency time course experiment shown in Fig. 1

ST2: Supp. Table 2 providing absolute metabolite concentrations and enzyme activities for the K-deficiency and re-supply experiment (Figs 2 and 3), including means, standard errors and p-values.

SF1: Supp. Figure 1: Full recovery of root pyruvate levels after 2 hours of K re-supply.

SF2: Supp. Figure 2: Changes in transcript levels of metabolic enzymes in response to K-deficiency and re-supply (data from Armengaud et al. 2004).
